# Supplementary material
Source: Research Square preprint supplement (doi:10.21203/rs.3.rs-10296124/v1)
Supplement: Supplementary file 1 [file 2b26756410b508d8194e4d84.docx]

**Supplementary Data:**

**
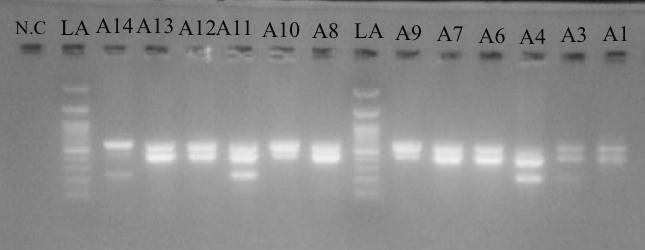
**

**Fig.1S.** Representative agarose gel electrophoresis of multiplex PCR amplicons for ES*β*L resistance genes. Lanes marked LA contain a 100 bp DNA molecular weight ladder. N.C designates the negative control (distilled water, D.W.) lacking template DNA. The distinct bands in the sample wells correspond to the targeted amplicon sizes for the detected resistance determinants: *bla*CTX-M, *bla*TEM, and *bla*SHV across the selected clinical isolates.
